# Supplementary material for: Determination of certain VOCs in paints and architectural coatings by dynamic headspace gas chromatography-mass spectrometry
Source: Royal Society of Chemistry journal article supplement (doi:10.1039/d1ay00273b), 2021-01-01
Supplement: d1ay00273b1.pdf [file d1ay00273b1.pdf]

## Determination of Certain VOC's in Paints and Architectural Coatings by Dynamic Headspace GC-MS - Supplementary Information

Nicholas P. Alderman\*, Matthew Courville and Ryszard Tokarczyk\*

Environment and Climate Change Canada, Analysis and Air Quality Section, 335 River Road,  
Ottawa, ON, Canada, K1V 1H2

### Description of Calibration

As the samples are concentrated by the adsorbent, traditional calibration of concentration vs response is difficult to conduct. This is due to being unable to take exactly the same small volume of thick paint/sample each time. Therefore we conducted the calibration by weight of analyte in each sample.

A calibration sample of analytes was produced by weighing each analyte into a 10 mL vial. For our calibrations, the analyte concentration (% by mass) was:

Acetone (9.1%), Methyl Acetate (10.7%), DCM (11.9%), 2CBTF (12.4%), 3CBTF (12.2%), 4 CBTF (12.1%), Dimethyl Carbonate (11.3%), t-butyl acetate (9.8%) and Propylene Carbonate (10.7%). 2- and 3-CBTF were added for interest only, are not excluded VOCs and were not part of this study.

Different masses of this sample were then taken for calibration, as shown below in Table S1.

Table S1 – Mass of analytes in each calibration sample

| Sample mass (mg) | Acetone (mg) | Methyl acetate (mg) | DCM (mg) | 2CBTF (mg) | 3CBTF (mg) | 4CBTF (mg) | Dimethyl carbonate (mg) | t-butyl acetate (mg) | propylene carbonate (mg) |
|------------------|--------------|---------------------|----------|------------|------------|------------|-------------------------|----------------------|--------------------------|
| 0.65             | 0.059        | 0.069               | 0.077    | 0.080      | 0.079      | 0.079      | 0.074                   | 0.063                | 0.069                    |
| 1.14             | 0.103        | 0.122               | 0.135    | 0.141      | 0.139      | 0.138      | 0.129                   | 0.111                | 0.122                    |
| 1.73             | 0.157        | 0.185               | 0.205    | 0.214      | 0.211      | 0.209      | 0.196                   | 0.169                | 0.185                    |
| 2.35             | 0.213        | 0.251               | 0.278    | 0.291      | 0.287      | 0.284      | 0.266                   | 0.229                | 0.251                    |
| 5.57             | 0.504        | 0.595               | 0.660    | 0.690      | 0.680      | 0.673      | 0.630                   | 0.544                | 0.595                    |
| 10.4             | 0.941        | 1.112               | 1.232    | 1.288      | 1.269      | 1.257      | 1.176                   | 1.015                | 1.111                    |

Table S2 – Calibration of selected excluded VOCs desorbed from a carbon absorbent

| Compound              | Slope | R <sup>2</sup> Value |
|-----------------------|-------|----------------------|
| Acetone               | 1697  | 0.981                |
| Methyl Acetate        | 4007  | 0.992                |
| Dichloromethane (DCM) | 2667  | 0.993                |
| Dimethyl Carbonate    | 1590  | 0.989                |
| t-butyl Acetate       | 1402  | 0.997                |

|                                  |      |       |
|----------------------------------|------|-------|
| 4-Chlorobenzotrifluoride (PCBTF) | 2537 | 0.996 |
| Propylene Carbonate              | 1121 | 0.993 |

Table S3 – The retention time and SIM ions of the excluded VOCs

| Compound                                        | Retention Time (mins) | Quantification ion | Qualifier ion |
|-------------------------------------------------|-----------------------|--------------------|---------------|
| Acetone                                         | 7.803                 | 43.1               | 58.1          |
| Acetone-d <sub>6</sub>                          |                       | 46.1               | 64.1          |
| Methyl Acetate                                  | 8.318                 | 43.1               | 74.1          |
| Methyl Acetate-d <sub>6</sub>                   |                       | 46.1               | 80.1          |
| Dichloromethane (DCM)                           | 8.593                 | 48.0               | 82.9          |
| Dichloromethane (DCM)-d <sub>2</sub>            |                       | 53.0               | 90.0          |
| Dimethyl Carbonate                              | 11.207                | 45.1               | 59.1          |
| Dimethyl Carbonate-d <sub>6</sub>               |                       | 50.0               | 68.1          |
| t-butyl Acetate                                 | 14.04                 | 59.0               | 101.1         |
| t-butyl Acetate-d <sub>12</sub>                 |                       | 46.1               | 66.1          |
| 4-Chlorobenzotrifluoride (PCBTF)                | 20.994                | 180.0              | 161.0         |
| 4-Chlorobenzotrifluoride (PCBTF)-d <sub>4</sub> |                       | 184.0              | 165.0         |
| Propylene Carbonate                             | 28.381                | 57.0               | 101.9         |
| (±)-1,2-Propylene-d <sub>6</sub> Carbonate      |                       | 62.0               | 89.9          |

Table S4 – Comparison of accuracy results between laboratory accredited Direct Injection method and the developed DHS method (the DHS method results are shown in brackets)

|                              | Acetone    | Methyl Acetate | Dichloro-methane | Dimethyl Carbonate | t-Butyl Acetate | 4-CBTF     | Propylene Carbonate |
|------------------------------|------------|----------------|------------------|--------------------|-----------------|------------|---------------------|
| Accuracy (%)                 | 1.6 (1.4)  | -2.3 (-4.6)    | 4.8 (-13.9)      | 0.6 (-1.0)         | -9.7 (-6.3)     | 2.1 (2.9)  | 2.5 (17.2)          |
| Precision (RSD) (%)          | 2.3 (11.0) | 2.3 (8.6)      | 2.5 (13.0)       | 2.0 (7.5)          | 5.0 (8.9)       | 1.2 (5.4)  | 1.7 (10.8)          |
| U (%) (Expanded Uncertainty) | 5.6 (23.6) | 5.6 (18.5)     | 6.1 (27.8)       | 4.9 (16.1)         | 12.2 (19.2)     | 2.9 (11.7) | 4.2 (23.2)          |

*Expanded uncertainty using Student's distribution coefficient for 2-tailed test at 95% CI*

Table S5 – Literature results from CARB 'Development of an Improved VOC Analysis method for Architectural Coatings' <sup>1</sup> compared to the developed DHS method (the DHS method results are shown in brackets)

|                       | Acetone         | Methyl Acetate | Dichloromethane | t-Butyl Acetate | 4-CBTF         |
|-----------------------|-----------------|----------------|-----------------|-----------------|----------------|
| Repeatability r (%)   | 1.2-5.0 (1.4)   | 0.5-4.6 (-4.6) | 3.0 (-13.9)     | 3.8 (-6.3)      | 1.0-2.7 (2.9)  |
| Reproducibility R (%) | 1.9-24.5 (11.0) | 0.7-29.3 (8.6) | 17.9 (13.0)     | 15.6 (8.9)      | 1.5-12.4 (5.4) |

Table S6 – Literature results from a static headspace method<sup>2</sup> compared to the developed DHS method (the DHS method results are shown in brackets)

|                              | Acetone    | Dichloromethane |
|------------------------------|------------|-----------------|
| Accuracy (%)                 | -1.6 (1.4) | -4.8 (-13.9)    |
| Precision (RSD) (%)          | 2.2 (11.0) | 3.6 (13.0)      |
| U (%) (Expanded Uncertainty) | 4.6 (23.6) | 6.0 (27.8)      |

## References

<sup>1</sup> Jones, D.R., Wills, M.T., Development of an Improved VOC Analysis Method for Architectural Coatings, 2008 Report, California Air Resources Board. Available from: <https://ww2.arb.ca.gov/sites/default/files/classic//research/apr/past/04-329.pdf>

<sup>2</sup> Deconincka, E., Canfyna M., Sacréa, P.-Y., Baudewyns, S., Coursellea P. and De Beer, J.O., A validated GC–MS method for the determination and quantification of residual solvents in counterfeit tablets and capsules, *Journal of Pharmaceutical and Biomedical Analysis*, 2021, **70**, 64–70.
